# Supplementary material for: Low-cost and facile synthesis of mesocellular carbon foams
Source: Royal Society of Chemistry journal article supplement (doi:10.1039/b208642e), 2002-01-01

# Supplementary Information for

**Low-cost and facile synthesis of mesocellular carbon foams**

Jinwoo Lee, Kwonnam Sohn and Taeghwan Hyeon*

1. N2 adsorption-desorption isotherms of AlMSU-F and AlMCF (Inset) Corresponding pore size distributions calculated using BJH (Barett-Joyner-Halenda) method from N2 adsorption branches.


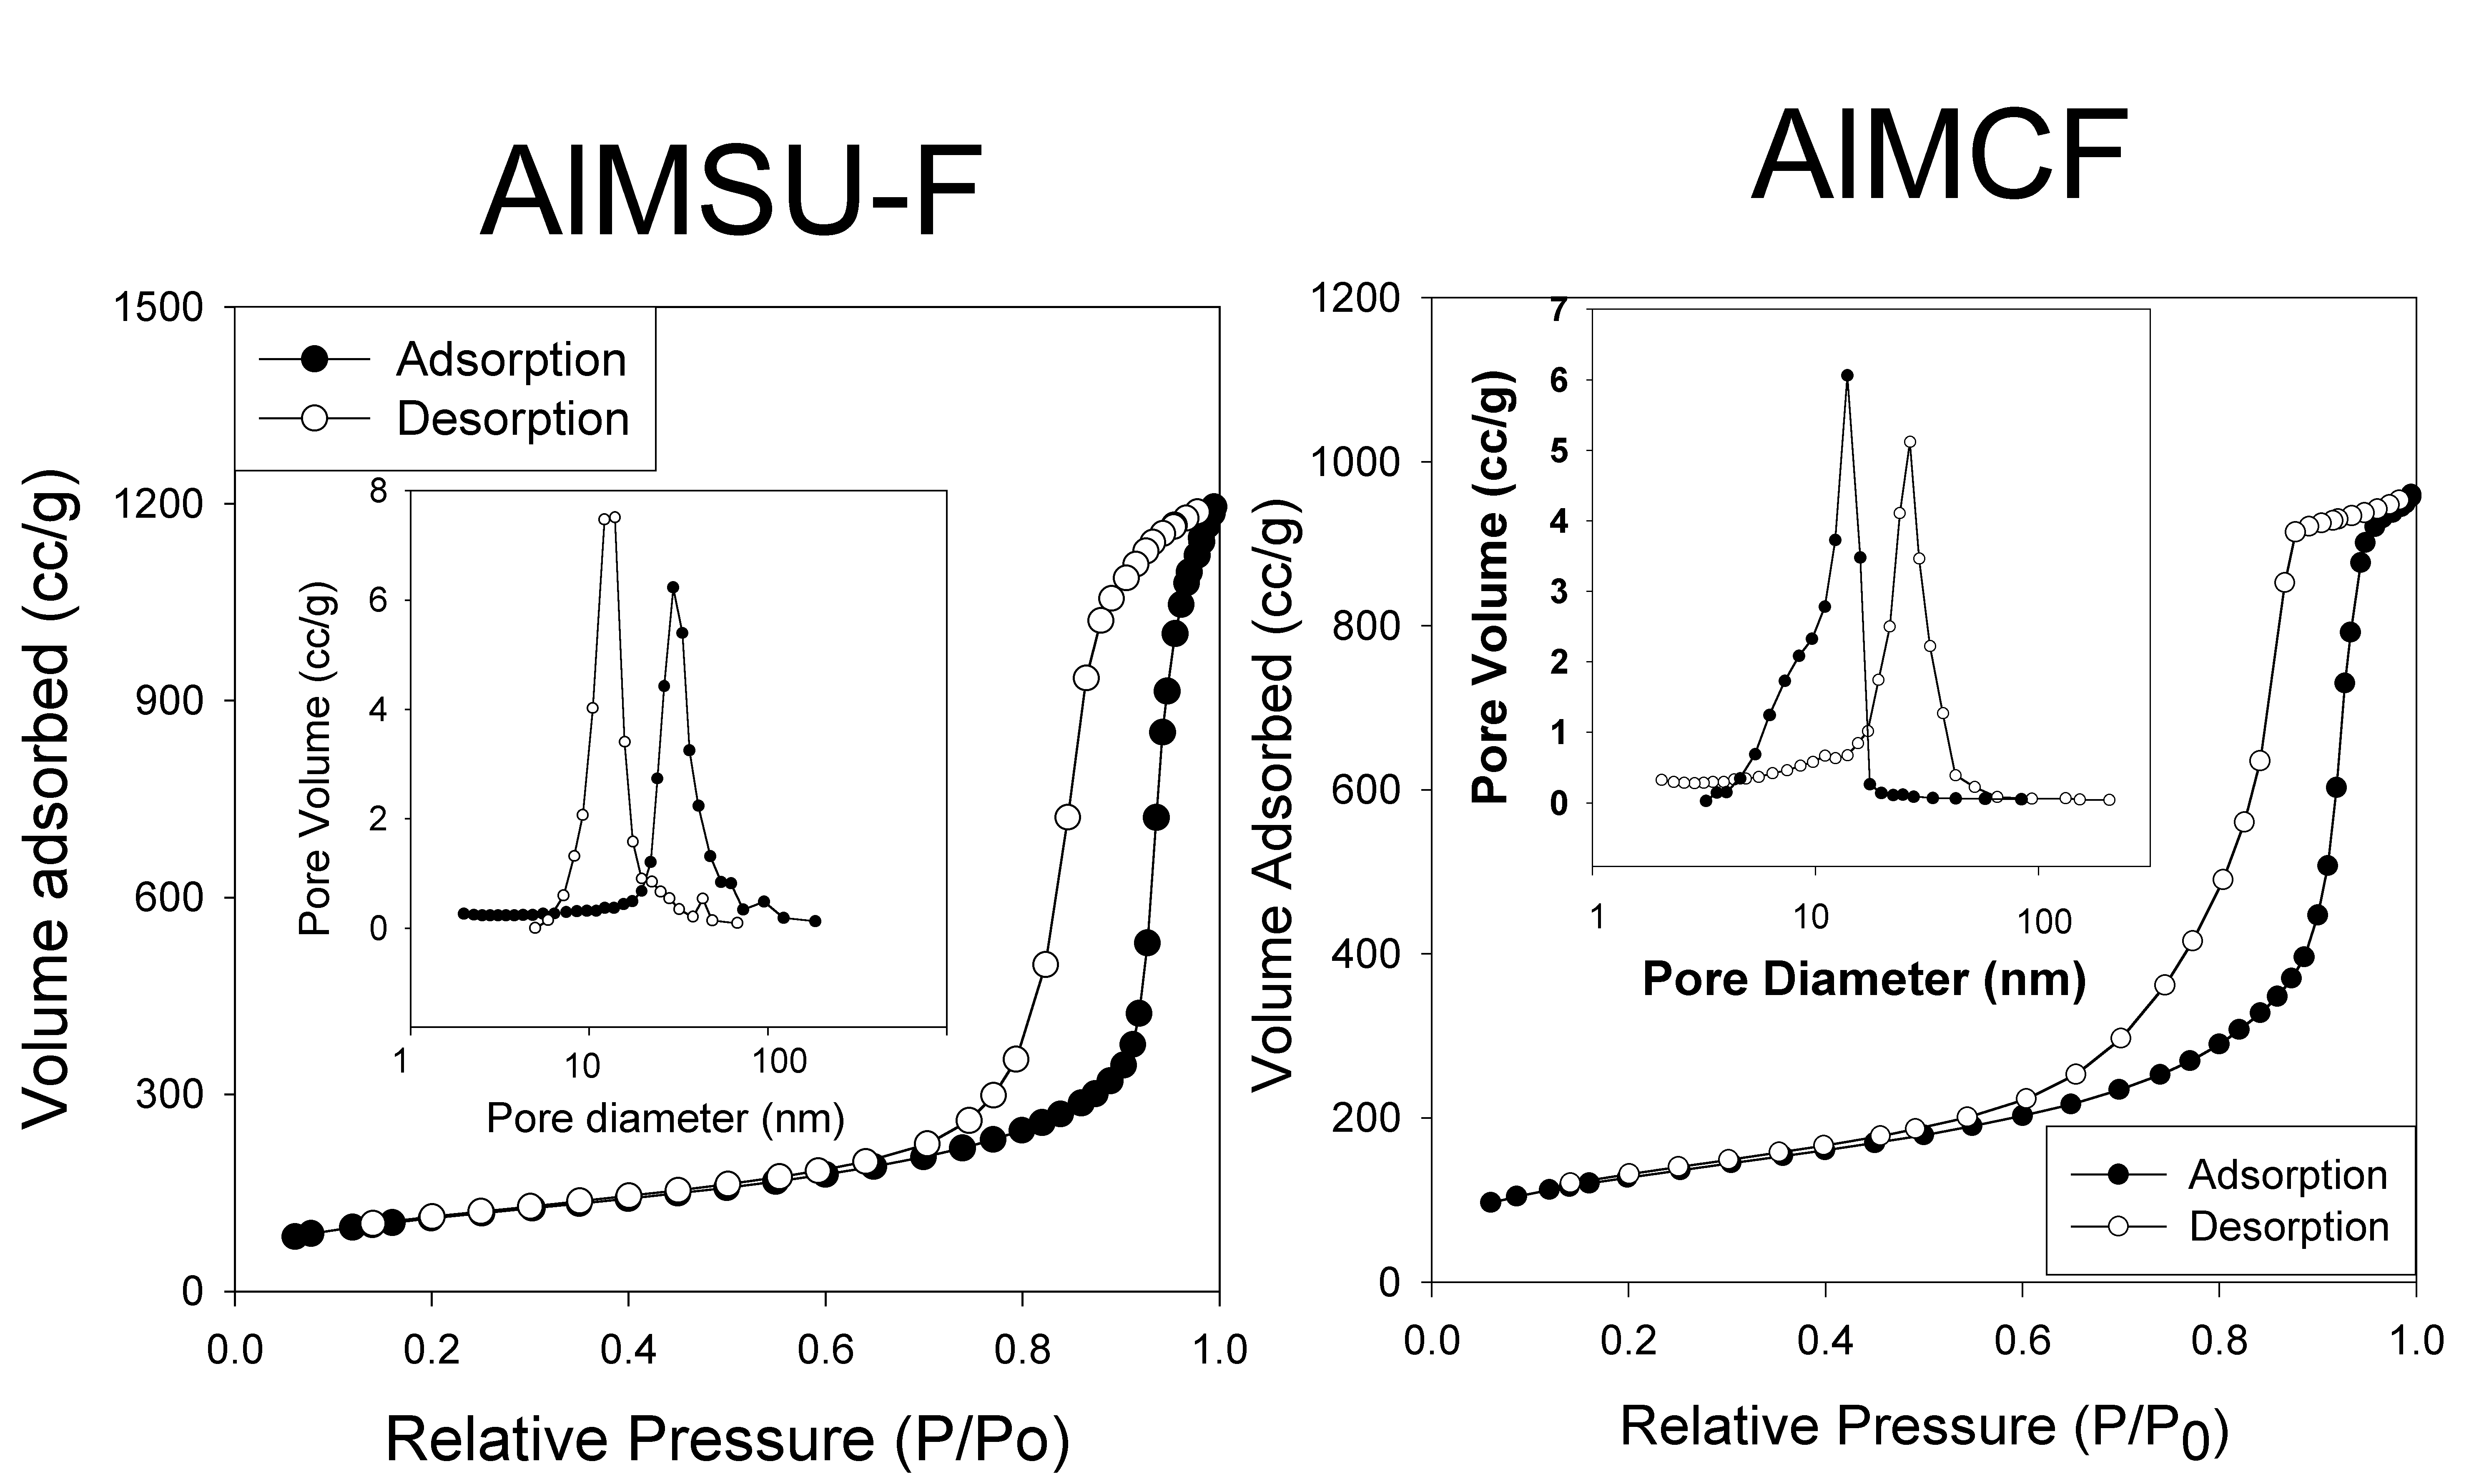


2. Transmission electron micrographic images (TEM) of AlMSU-F and AlMCF


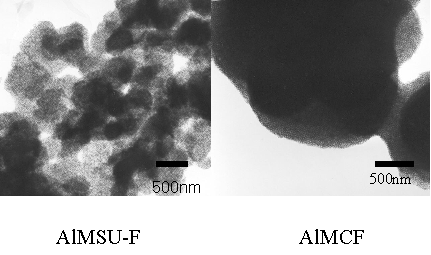


1. Transmission electron micrographic images (TEM) of AlMSU-F/Carbon

composite
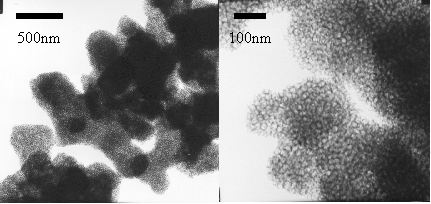


1. Scanning electron microscopic images (SEM) of AlMSU-F and AlMCF


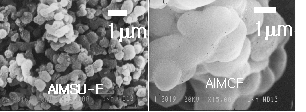

Supplement: b208642e.doc [file b208642e.doc]
